# Supplementary material for: Efficient Reprogramming of Mouse Embryonic Stem Cells into Trophoblast Stem-like Cells via Lats Kinase Inhibition
Source: MDPI journal article supplement (doi:10.3390/biology13020071), 2024-01-24
Supplement: s1 [file s1]

## Supplementary Tables S1

### Antibodies used in this study.

| Antigen | Manufacturer | Catalog number   | Dilution |
|---------|--------------|------------------|----------|
| OCT4    | Santa Cruz   | sc-5279          | 1: 50    |
| GATA6   | R&D Systems  | AF1700           | 1: 200   |
| E-CAD   | Abcam        | ab11512          | 1: 300   |
| CDX2    | Abcam        | ab76541          | 1: 300   |
| KRT7    | Abcam        | ab181598         | 1: 300   |
| YAP1    | My BioSource | MBS8535224       | 1: 50    |
| TPBPA   | Abcam        | ab104401         | 1: 300   |
| SYNA    | Biorbyt      | orb312961-CF405M | 1: 150   |
| TFAP2C  | Santa Cruz   | sc-12762         | 1: 100   |
| GFP     | R&D Systems  | MAB42402-SP      | 1: 300   |

## Supplementary Tables S2

qRT-PCR primer was used in this study.

| Target        | Direction | Sequence (5'-3')      |
|---------------|-----------|-----------------------|
| <i>Gapdh</i>  | forward   | TGTGAACGGATTTGGCCGTA  |
| <i>Gapdh</i>  | reverse   | ACTGTGCCGTTGAATTTGCC  |
| <i>Cdx2</i>   | forward   | CTGGACAAGGACGTGAGCAT  |
| <i>Cdx2</i>   | reverse   | ACTGCGGAGGACTGACAAAG  |
| <i>Tfap2c</i> | forward   | GAGGTGCAGAATGTGGACGA  |
| <i>Tfap2c</i> | reverse   | CCCCAAAGGGTTCTTGGTCA  |
| <i>Gata3</i>  | forward   | GCTCCTTGCTACTCAGGTGAT |
| <i>Gata3</i>  | reverse   | GGAGGGAGAGAGGAATCCGA  |
| <i>Tead4</i>  | forward   | TTGAGCGAAGCTTCCAGGAG  |
| <i>Tead4</i>  | reverse   | TTCCGACCATACATCTTGCCT |
| <i>Gata2</i>  | forward   | CGACCACACTTGTTGCACAG  |
| <i>Gata2</i>  | reverse   | GGGTAAACAGACAGAGGCC   |
| <i>Oct4</i>   | forward   | GAGAAGTGGGTGGAGGAAGC  |
| <i>Oct4</i>   | reverse   | GGAAAGGTGTCCCTGTAGCC  |
| <i>Sox2</i>   | forward   | GATCAGCATGTACCTCCCCG  |
| <i>Sox2</i>   | reverse   | CTGGGCCATGTGCAGTCTAC  |
| <i>Gata6</i>  | forward   | TATTCACCAGCAGCGACTAGC |
| <i>Gata6</i>  | reverse   | GAGGACGAAGACGAGATGGG  |
| <i>PDGFRa</i> | forward   | CGCTGGAGGGTTATCGAGTC  |
| <i>PDGFRa</i> | reverse   | CAGGTTGGGACCGGCTTAAT  |
| <i>Gata4</i>  | forward   | TGTGTAGCAGGCAGAAAGCA  |
| <i>Gata4</i>  | reverse   | GGTTGCTCCAGAAATCGTGC  |
| <i>Eomes</i>  | forward   | GGAAGTGACAGAGGACGGTG  |
| <i>Eomes</i>  | reverse   | TTGGCGAAGGGGTTATGGTC  |
| <i>Elf5</i>   | forward   | GTCAAGACTGTCACAGCCGA  |
| <i>Elf5</i>   | reverse   | TTCCCATTCCAGGATGCCAC  |
| <i>Tfap2a</i> | forward   | TTCTGTTCAAGTTCCGGGTG  |
| <i>Tfap2a</i> | reverse   | CTCCCTGCTGGCAGATTCAA  |
| <i>Tpbpa</i>  | forward   | TAGTCCCTGAAGCGCAGTTG  |
| <i>Tpbpa</i>  | reverse   | CTGACCGGAGGCACTCATTT  |
| <i>Gcm1</i>   | forward   | TATGTGCCCTCCCTCACGTA  |
| <i>Gcm1</i>   | reverse   | TAAGCCCATGCATGCCATCT  |
| <i>Prl3d1</i> | forward   | CCCCTGTGTCATACTGCTTCC |
| <i>Prl3d1</i> | reverse   | TCCTGGGAGAGCCGTCAGT   |
| <i>SynA</i>   | forward   | CCAGCCCCACTAAGGACTTG  |

|              |         |                      |
|--------------|---------|----------------------|
| <i>SynA</i>  | reverse | GACGTGGTCATCGGGGTATC |
| <i>Ctsq</i>  | forward | TAGAGGCTGTCGTTGGGGTA |
| <i>Ctsq</i>  | reverse | GCAATGGGGCCTTTAGTTGC |
| <i>SynB</i>  | forward | GGCCCCACTCTGCATATCTC |
| <i>SynB</i>  | reverse | AGCGGGTTTTTCCATTTGGC |
| <i>Ascl2</i> | forward | AGCACACCTTGACTGGTACG |
| <i>Ascl2</i> | reverse | AGTGGACGTTTGACCTTCA  |
| <i>Hand1</i> | forward | CAAGCGGAAAAGGGAGTTGC |
| <i>Hand1</i> | reverse | TCACTGGTTTAGCTCCAGCG |

### Supplementary Tables S3

#### Primers for methylated specific PCR

| Target        | Direction | Sequence (5'-3')           |
|---------------|-----------|----------------------------|
| <i>Oct4</i>   | forward   | TGAGGAGTGGTTTTAGAAATAATTG  |
| <i>Oct4</i>   | reverse   | CCACCCTCTAACCTTAACCTCTAAC  |
| <i>Cdx2</i>   | forward   | TAAAGTGTATTTAGGTTGGAAGGAG  |
| <i>Cdx2</i>   | reverse   | AACACAAACACCAATAACTAAAAAC  |
| <i>Tfap2c</i> | forward   | TGGGGAAATTTTAGTTGTTAGTTTT  |
| <i>Tfap2c</i> | reverse   | CCAACCAATCCCTACCTAACTC     |
| <i>Krt7</i>   | forward   | GTTGTGGGTATTTTGGATAATTTGT  |
| <i>Krt7</i>   | reverse   | TCTCTACAACCAAAACCTTCCTATC  |
| <i>Tead4</i>  | forward   | TTTAAGGGATAAGGAAAGAATTGAAA |
| <i>Tead4</i>  | reverse   | AAAACAAAAAAAACCTATTCCCTTCC |

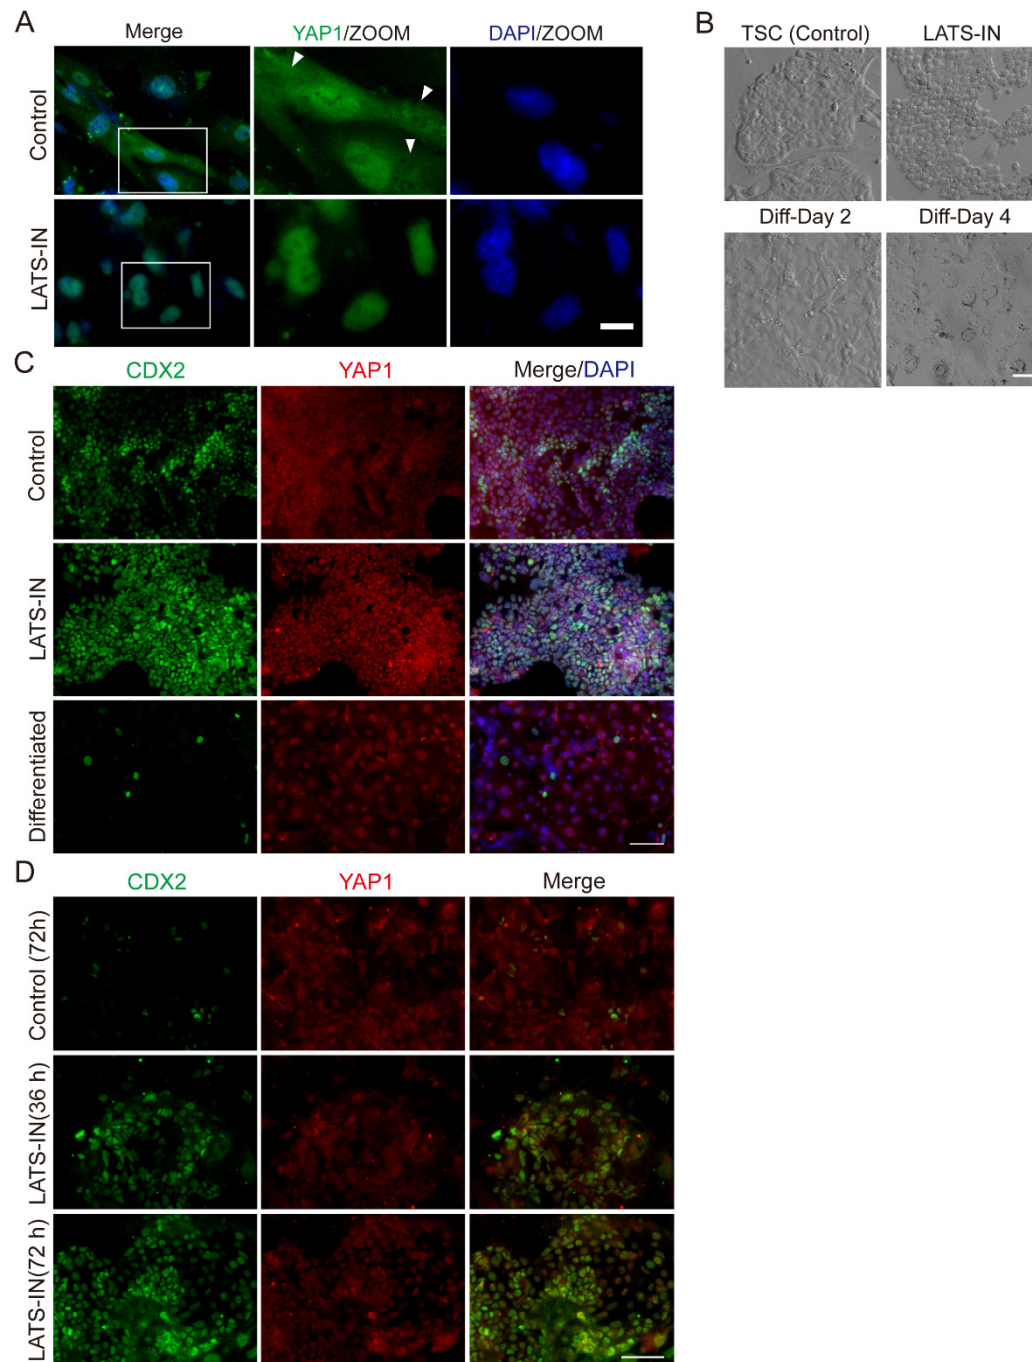

**Supplementary Figure S1. The small molecule compound LATS-IN-1 can promote the accumulation of YAP in the nucleus of mouse embryonic fibroblasts.**

**A.** Immunostaining for YAP1 of mouse embryonic fibroblasts. “LATS-IN” refers to the MEF induced with a 3 $\mu$ M concentration of LATS-IN-1 (An inhibitor of Lats kinase) factor. Cell nuclei were stained with DAPI (blue). The white box indicates the enlarged area; white arrows indicate YAP1 accumulation in the cytoplasm. **B.** Cell morphology of TSC cultured with LATS-IN-1 for 2 days and differentiation for 2 and 4 days. **C.** Immunostaining for CDX2 and YAP1 of different types of trophoblast stem cells. “Control” refers to the conventional TSC culture medium; “LATS-IN” refers to the

addition of a 3 $\mu$ M concentration of LATS-IN-1 to the TSC culture medium; “Differentiated” refers to the TSC after 3 days of random differentiation. Cell nuclei were stained with DAPI (blue). **D.** Immunostaining for CDX2 and YAP1 of differentiated TSC and differentiated TSC was treated with LATS-IN-1 factor for 36h and 72h. Cell nuclei were stained with DAPI (blue). Scale bars: 10 $\mu$ m in (A); 20 $\mu$ m in (B), 50 $\mu$ m in (C) and (D).

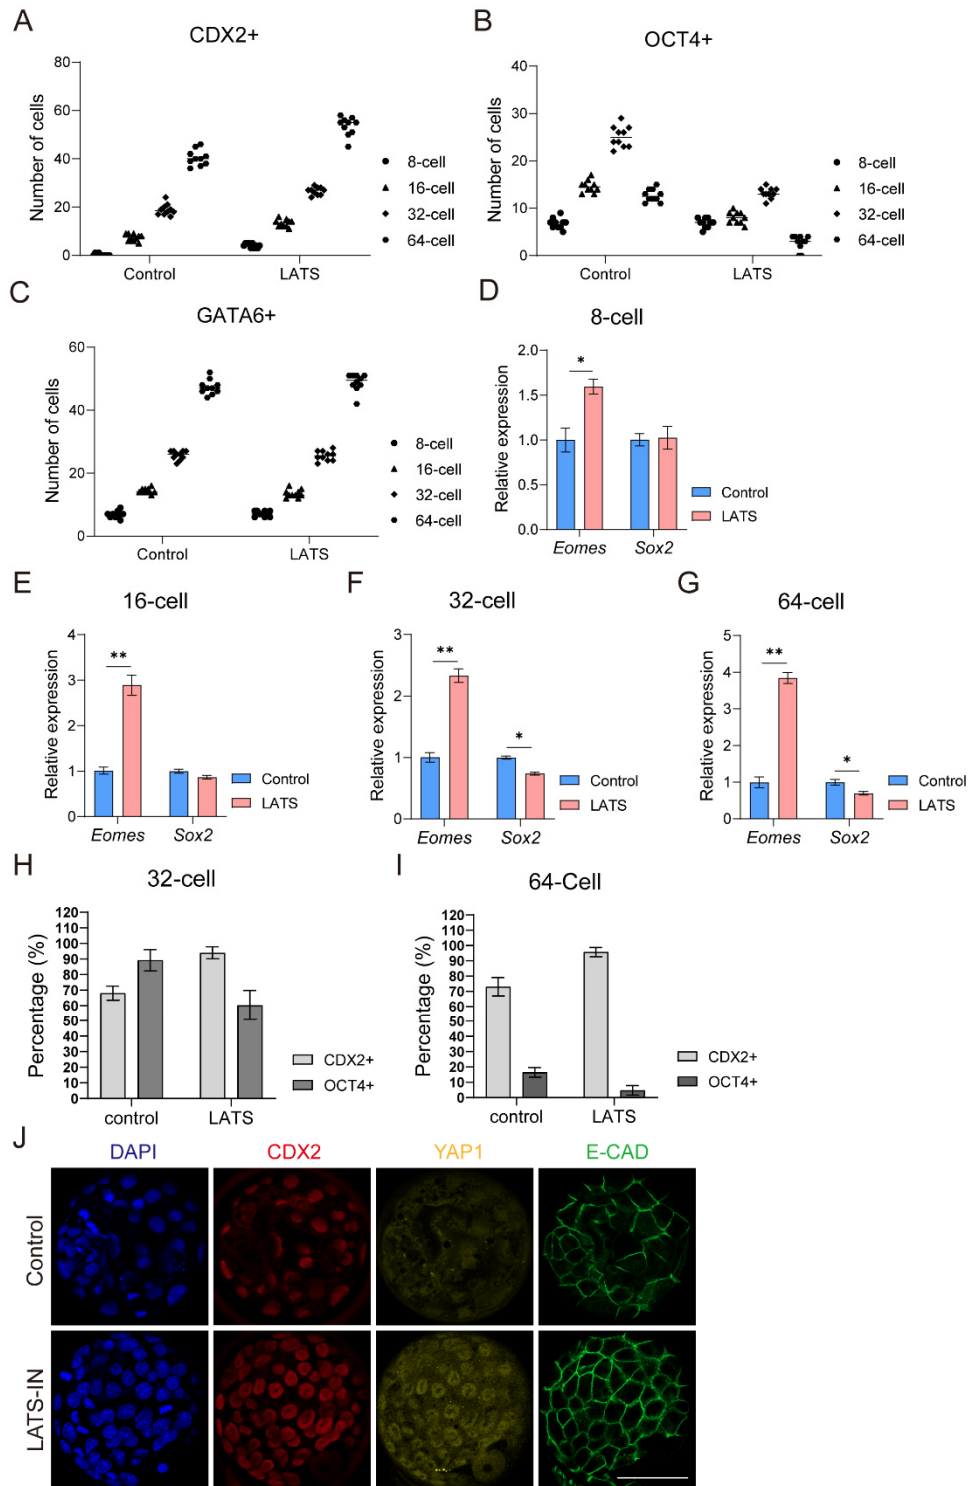

**Supplementary Figure S2. Inhibition of lats kinase regulates the specialization of embryonic lineages.** **A-C.** Comparison of the number of CDX2-positive, OCT4-positive, and GATA6-positive cells of the 8-cell stage, 16-cell stage, 32-cell stage, and 64-cell stage mouse embryos cultured with LATS-IN-1.  $n=10$ . **D-G.** Relative expression for *Eomes* and *Sox2* in the 8-cell stage, 16-cell stage, 32-cell stage, and 64-cell stage mouse embryos cultured with LATS-IN-1 were detected by qRT-PCR. qRT-PCR data were normalized to *Gapdh*,  $n=3$ . **H.** The percentage of the number of CDX2-

positive, and OCT4-positive cells of 32-cell stage mouse embryos cultured with LATS-IN-1. n=10. **I.** The percentage of the number of CDX2-positive, and OCT4-positive cells of 64-cell stage mouse embryos cultured with LATS-IN-1. n=10. **J.** Immunostaining for E-CAD, CDX2, and YAP1 of the blastocyst (control) and LATS-IN-1 induced blastocysts (LATS-IN-1). Cell nuclei were stained with DAPI (blue). The images were single focal plane, and the thickness of the optical section was 1.5 $\mu$ m. For each graph, the data were represented as mean  $\pm$  SEM, analyzed by Student's t-test, \*p < 0.05, \*\*p < 0.01. Scale bars: 50 $\mu$ m in (H).



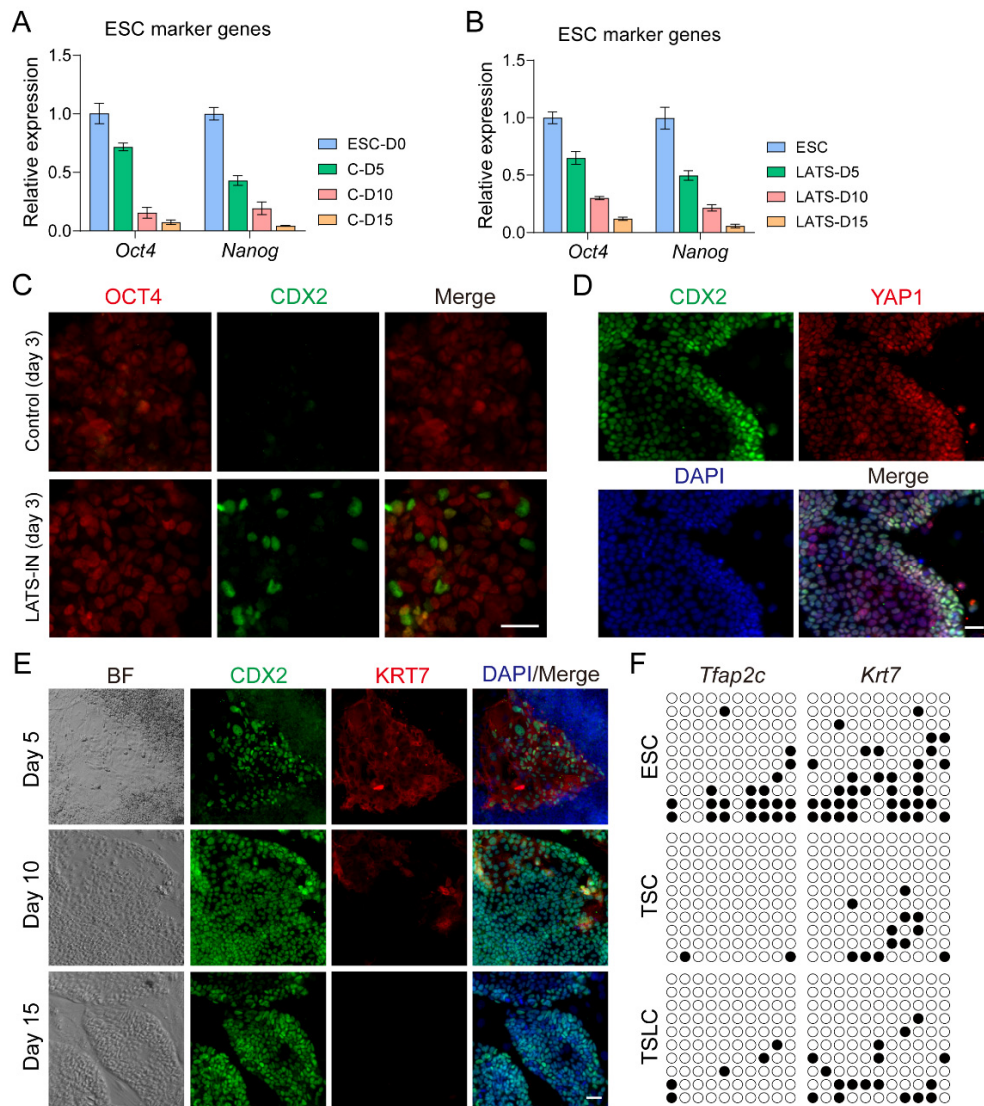

### Supplementary Figure S3. Inhibition of lats kinase can reprogram ESCs into TSC-like cells.

**A.** Relative expression for *Oct4* and *Nanog* in ESC cultured with TSC medium for 0, 5, 10, and 15 days were detected by qRT-PCR. qRT-PCR data were normalized to Gapdh, n=3. **B.** Relative expression for *Oct4* and *Nanog* in ESC cultured with LATS-IN-1 induction medium for 0, 5, 10, and 15 days were detected by qRT-PCR. qRT-PCR data were normalized to Gapdh, n=3. **C.** Immunostaining for CDX2 and OCT4 of ESC cultured with LATS-IN-1 induction medium for 3 days. Cell nuclei were stained with DAPI (blue). **D.** Immunostaining for CDX2 and YAP1 of ESC cultured with LATS-IN-1 induction medium for 15 days. Cell nuclei were stained with DAPI (blue). **E.** Immunostaining for CDX2 and KRT7 of ESC cultured with LATS-IN-1 induction medium for 5, 10, and 15 days. Cell nuclei were stained with DAPI (blue). **F.** DNA methylation status of *Tfap2c* and *Krt7* promoter regions in ESC, TSC, and TSLC. For each gene, Bisulfite sequencing of 10 samples was performed. Open and closed circles indicated the unmethylated and methylated CpGs. Scale bars, 20μm in (C), (D), and (E).

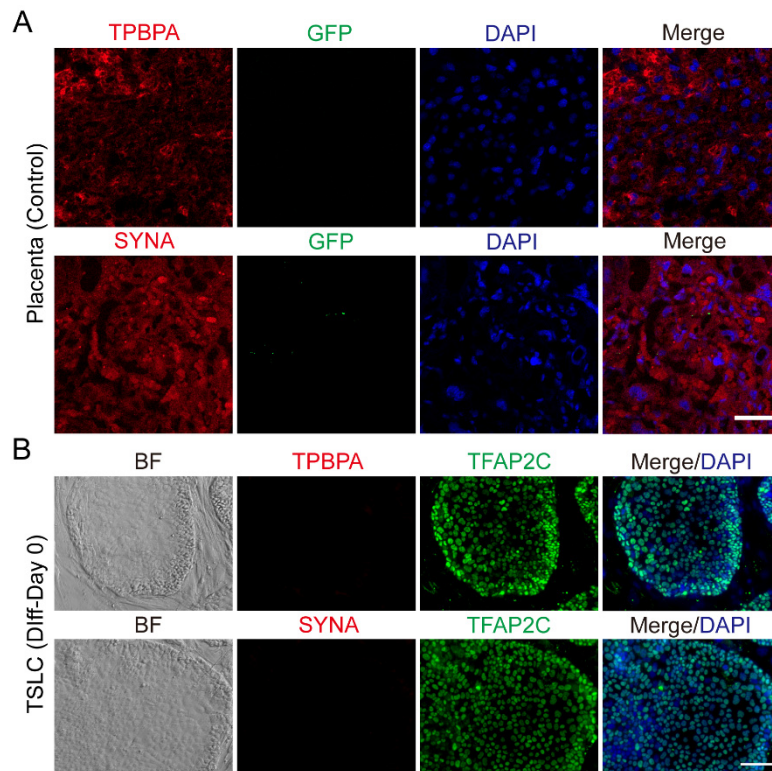

**Supplementary Figure S4. TSLC has the potential to differentiate into mature trophoblast cells.**

**A.** Immunostaining for SYNA and TPBPA of the E13.5 placenta (control). Cell nuclei were stained with DAPI (blue). **B.** Expression of TPBPA, SYNA, and TFAP2C of undifferentiated TSLCs were detected by immunofluorescence. Cell nuclei were stained with DAPI (blue). Scale bars: 20μm in (A), 50μm in (B).
